# Supplementary material
Source: PubMed Central journal article supplement (PMC4800066)

**Figure S1.** Schematic diagram illustrating analysis of H3K36me3 frequency within defined breakpoint regions and analysis of chromosomal complexity of SETD2 mutant tumors in the TCGA ccRCC dataset.

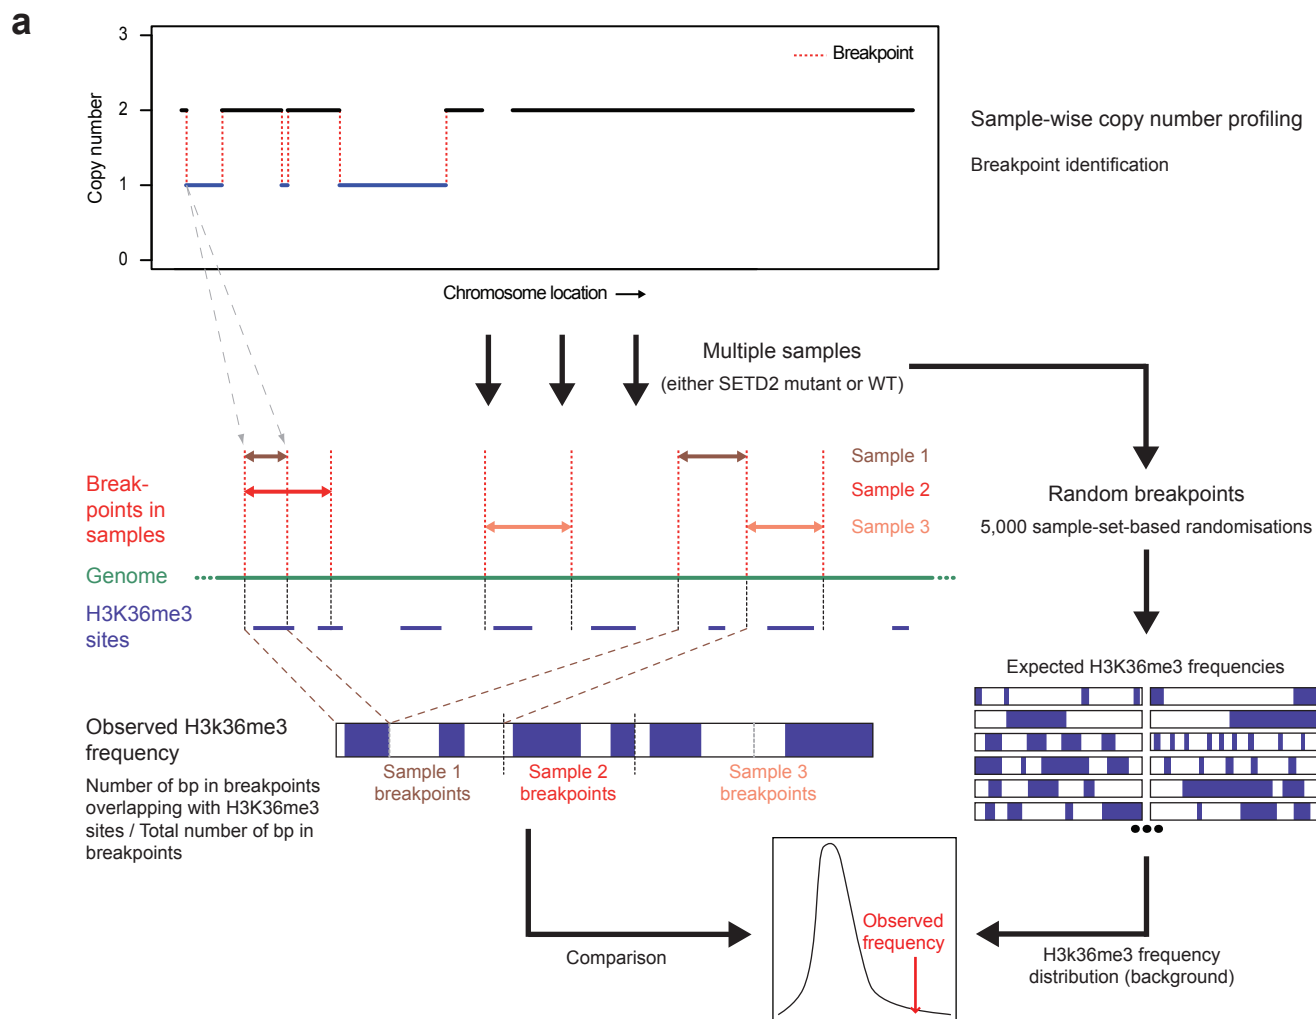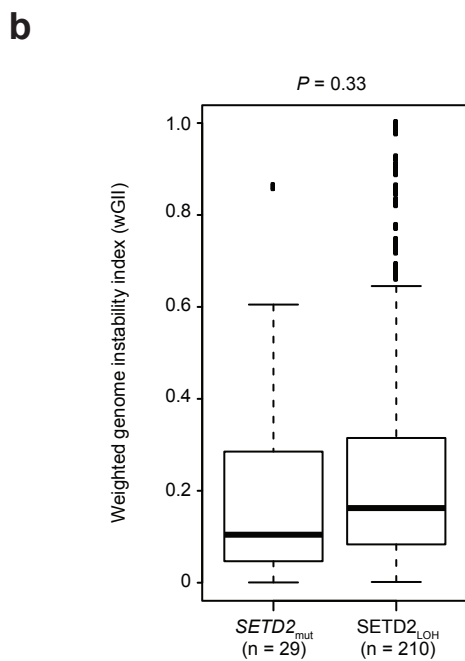

Supplement: onc201524x2.pdf [file onc201524x2.pdf]
