# Supplementary material
Source: PubMed Central journal article supplement (PMC4800066)
Supplement: onc201524x18.pdf [file onc201524x18.pdf]

**SI Table 1.** Frequency of LOH on VHL and SETD2 amongst TCGA ccRCC samples.

Complete sequencing and CGH data were available for 262 cases (dbGaP accession number: phs000178.v5.;

## Copy Number

| Mutations | Total | VHL LOH | SETD2 LOH | Both LOH | None LOH | NA |    |
|-----------|-------|---------|-----------|----------|----------|----|----|
|           | Total | 262     | 241       | 239      | 238      | 20 | 31 |
|           | VHL   | 122     | 115       | 112      | 112      | 7  | 14 |
|           | SETD2 | 30      | 28        | 28       | 28       | 2  | 4  |
|           | Both  | 15      | 13        | 13       | 13       | 2  | 3  |
|           | None  | 125     | 111       | 112      | 111      | 13 | 16 |
|           | NA    | 188     | 155       | 157      | 153      | 29 | 0  |

**SI Table 2.** MutSig analysis to identify significantly recurrent mutations in ccRCC

| gene    | expr    | reptime | hic | N_nonsilent | N_silent | N_noncoding | n_nonsilent | n_silent | n_noncoding | nnei | x   | X         | p            | q            |
|---------|---------|---------|-----|-------------|----------|-------------|-------------|----------|-------------|------|-----|-----------|--------------|--------------|
| BAP1    | 1078407 | 229     | 62  | 2134715     | 617419   | 3086688     | 33          | 1        | 2           | 49   | 79  | 122827716 | 0            | 0            |
| CLOCK   | 235221  | 384     | 22  | 2550669     | 649572   | 3800973     | 4           | 0        | 3           | 7    | 25  | 28356911  | 0            | 0            |
| EBPL    | 425192  | 296     | 62  | 596662      | 178673   | 796092      | 8           | 0        | 0           | 29   | 57  | 77303545  | 0            | 0            |
| KANK3   | 752886  | 204     | 7   | 2270653     | 789173   | 842490      | 5           | 0        | 1           | 50   | 117 | 146031193 | 0            | 0            |
| PBRM1   | 1217701 | 231     | 47  | 4894582     | 1236059  | 7560432     | 127         | 1        | 7           | 20   | 60  | 67076856  | 0            | 0            |
| SETD2   | 593886  | 365     | 46  | 7464787     | 2030930  | 4683756     | 47          | 2        | 4           | 4    | 11  | 15229533  | 0            | 0            |
| VHL     | 825905  | 170     | 39  | 608872      | 184778   | 614163      | 167         | 6        | 2           | 1    | 8   | 1088318   | 1.110223e-16 | 2.991575e-13 |
| KDM5C   | 877207  | NaN     | 80  | 4592588     | 1364671  | 3296700     | 22          | 0        | 1           | 5    | 6   | 13384195  | 5.884182e-15 | 1.387343e-11 |
| PTEN    | 259678  | 300     | 34  | 1232396     | 286528   | 2108667     | 18          | 2        | 3           | 3    | 9   | 5492872   | 6.459899e-11 | 1.353851e-07 |
| TP53    | 2069567 | 213     | 34  | 1257223     | 347171   | 2181927     | 13          | 1        | 1           | 4    | 4   | 9060227   | 1.145001e-06 | 2.159700e-03 |
| STAG3L2 | 745065  | 173     | 55  | 416768      | 107041   | 1590963     | 6           | 0        | 6           | 3    | 6   | 4242161   | 1.386555e-06 | 2.377563e-03 |
| CR1     | 442029  | 361     | 18  | 7377689     | 1967845  | 6235647     | 13          | 0        | 2           | 4    | 4   | 17610076  | 3.076631e-06 | 4.835951e-03 |
| MTOR    | 577167  | 416     | 32  | 7527058     | 2091980  | 16137957    | 28          | 3        | 6           | 7    | 26  | 41772852  | 1.110749e-05 | 1.611611e-02 |
| PIK3CA  | 401889  | 613     | 11  | 3212858     | 800569   | 4134306     | 15          | 1        | 3           | 12   | 39  | 45527834  | 1.668844e-05 | 2.248410e-02 |

**SI Table 3.**

Differential enrichment of adult kidney H3K36me3 marks within defined chromosomal segment and breakpoint region lengths.

| lSeg | lBrk  | WT/LOH (n=210) |        |             |             | Mutant (n=28+1) |        |             |
|------|-------|----------------|--------|-------------|-------------|-----------------|--------|-------------|
|      |       | nBrk           | AvgBrk | k36<expect) | k27<expect) | nBrk            | AvgBrk | k36>expect) |
| 1Mb  | 10kb  | 3505           | 16.7   | 0.0628      | 0.0114      | 352             | 12.1   | 0.217       |
| 1Mb  | 20kb  | 3636           | 17.3   | 0.352       | 0.135       | 370             | 12.8   | 0.0446      |
| 1Mb  | 50kb  | 3829           | 18.2   | 0.0472      | 0.951       | 406             | 14.0   | 0.313       |
| 1Mb  | 100kb | 4054           | 19.3   | 0.0012      | 0.831       | 441             | 15.2   | 0.697       |
| 2Mb  | 10kb  | 1658           | 7.9    | 0.331       | 0.229       | 202             | 7.0    | 0.085       |
| 2Mb  | 20kb  | 1741           | 8.3    | 0.231       | 0.815       | 211             | 7.3    | 0.0064      |
| 2Mb  | 50kb  | 1880           | 9.0    | 0.0368      | 0.966       | 236             | 8.1    | 0.0796      |
| 2Mb  | 100kb | 2025           | 9.6    | 0.0052      | 0.589       | 259             | 8.9    | 0.382       |
| 5Mb  | 10kb  | 685            | 3.3    | 0.0386      | 0.182       | 94              | 3.2    | 0.238       |
| 5Mb  | 20kb  | 710            | 3.4    | 0.0216      | 0.452       | 99              | 3.4    | 0.247       |
| 5Mb  | 50kb  | 766            | 3.6    | <.0002      | 0.496       | 107             | 3.7    | 0.0746      |
| 5Mb  | 100kb | 825            | 3.9    | 0.007       | 0.0892      | 114             | 3.9    | 0.156       |
| 10Mb | 10kb  | 321            | 1.5    | 0.0144      | 0.597       | 35              | 1.2    | 0.412       |
| 10Mb | 20kb  | 327            | 1.6    | 0.0046      | 0.288       | 37              | 1.3    | 0.0584      |
| 10Mb | 50kb  | 349            | 1.7    | 0.002       | 0.404       | 39              | 1.3    | 0.005       |
| 10Mb | 100kb | 368            | 1.8    | 0.0046      | 0.389       | 41              | 1.4    | 0.354       |

Footnote:

lSeg Minimum segment length

lBrk Maximum breakpoint region length

AvgBrk Average number of breakpoint regions per sample

&lt;expect p-value for the observed mark frequency to be inferior to expectations, as given by 5,000 randomizations

&gt;expect p-value for the observed mark frequency to be superior to expectations
