# Supplementary material
Source: PubMed Central journal article supplement (PMC4800066)

**Figure S7.** i Microsatellite instability analysis in ccRCC primary tumors and cell lines.

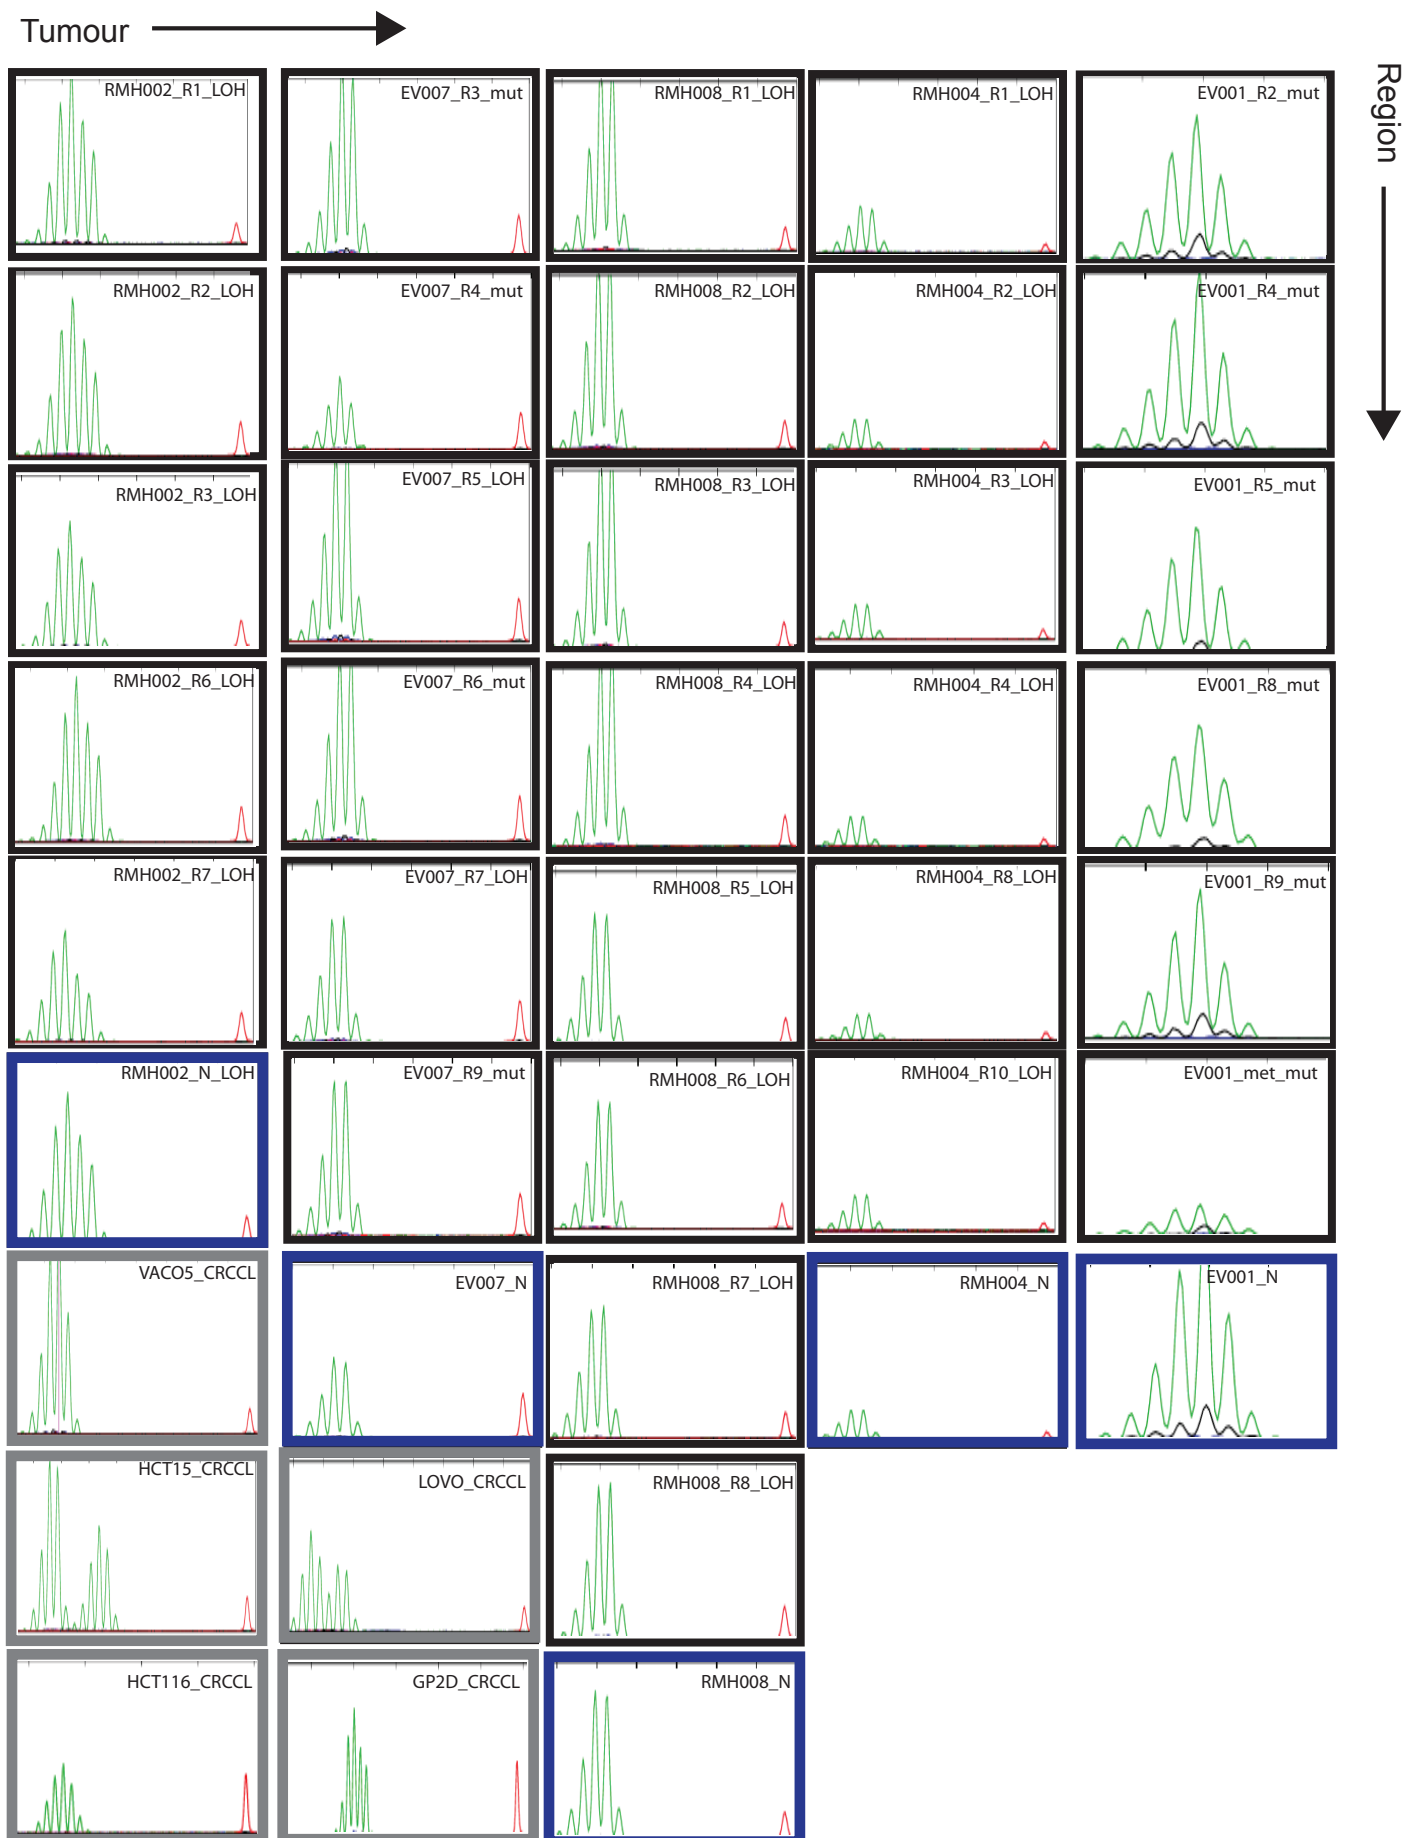

Supplement: onc201524x10.pdf [file onc201524x10.pdf]

**Figure S8.** Transcriptional and replication alterations following SETD2 depletion by siRNA

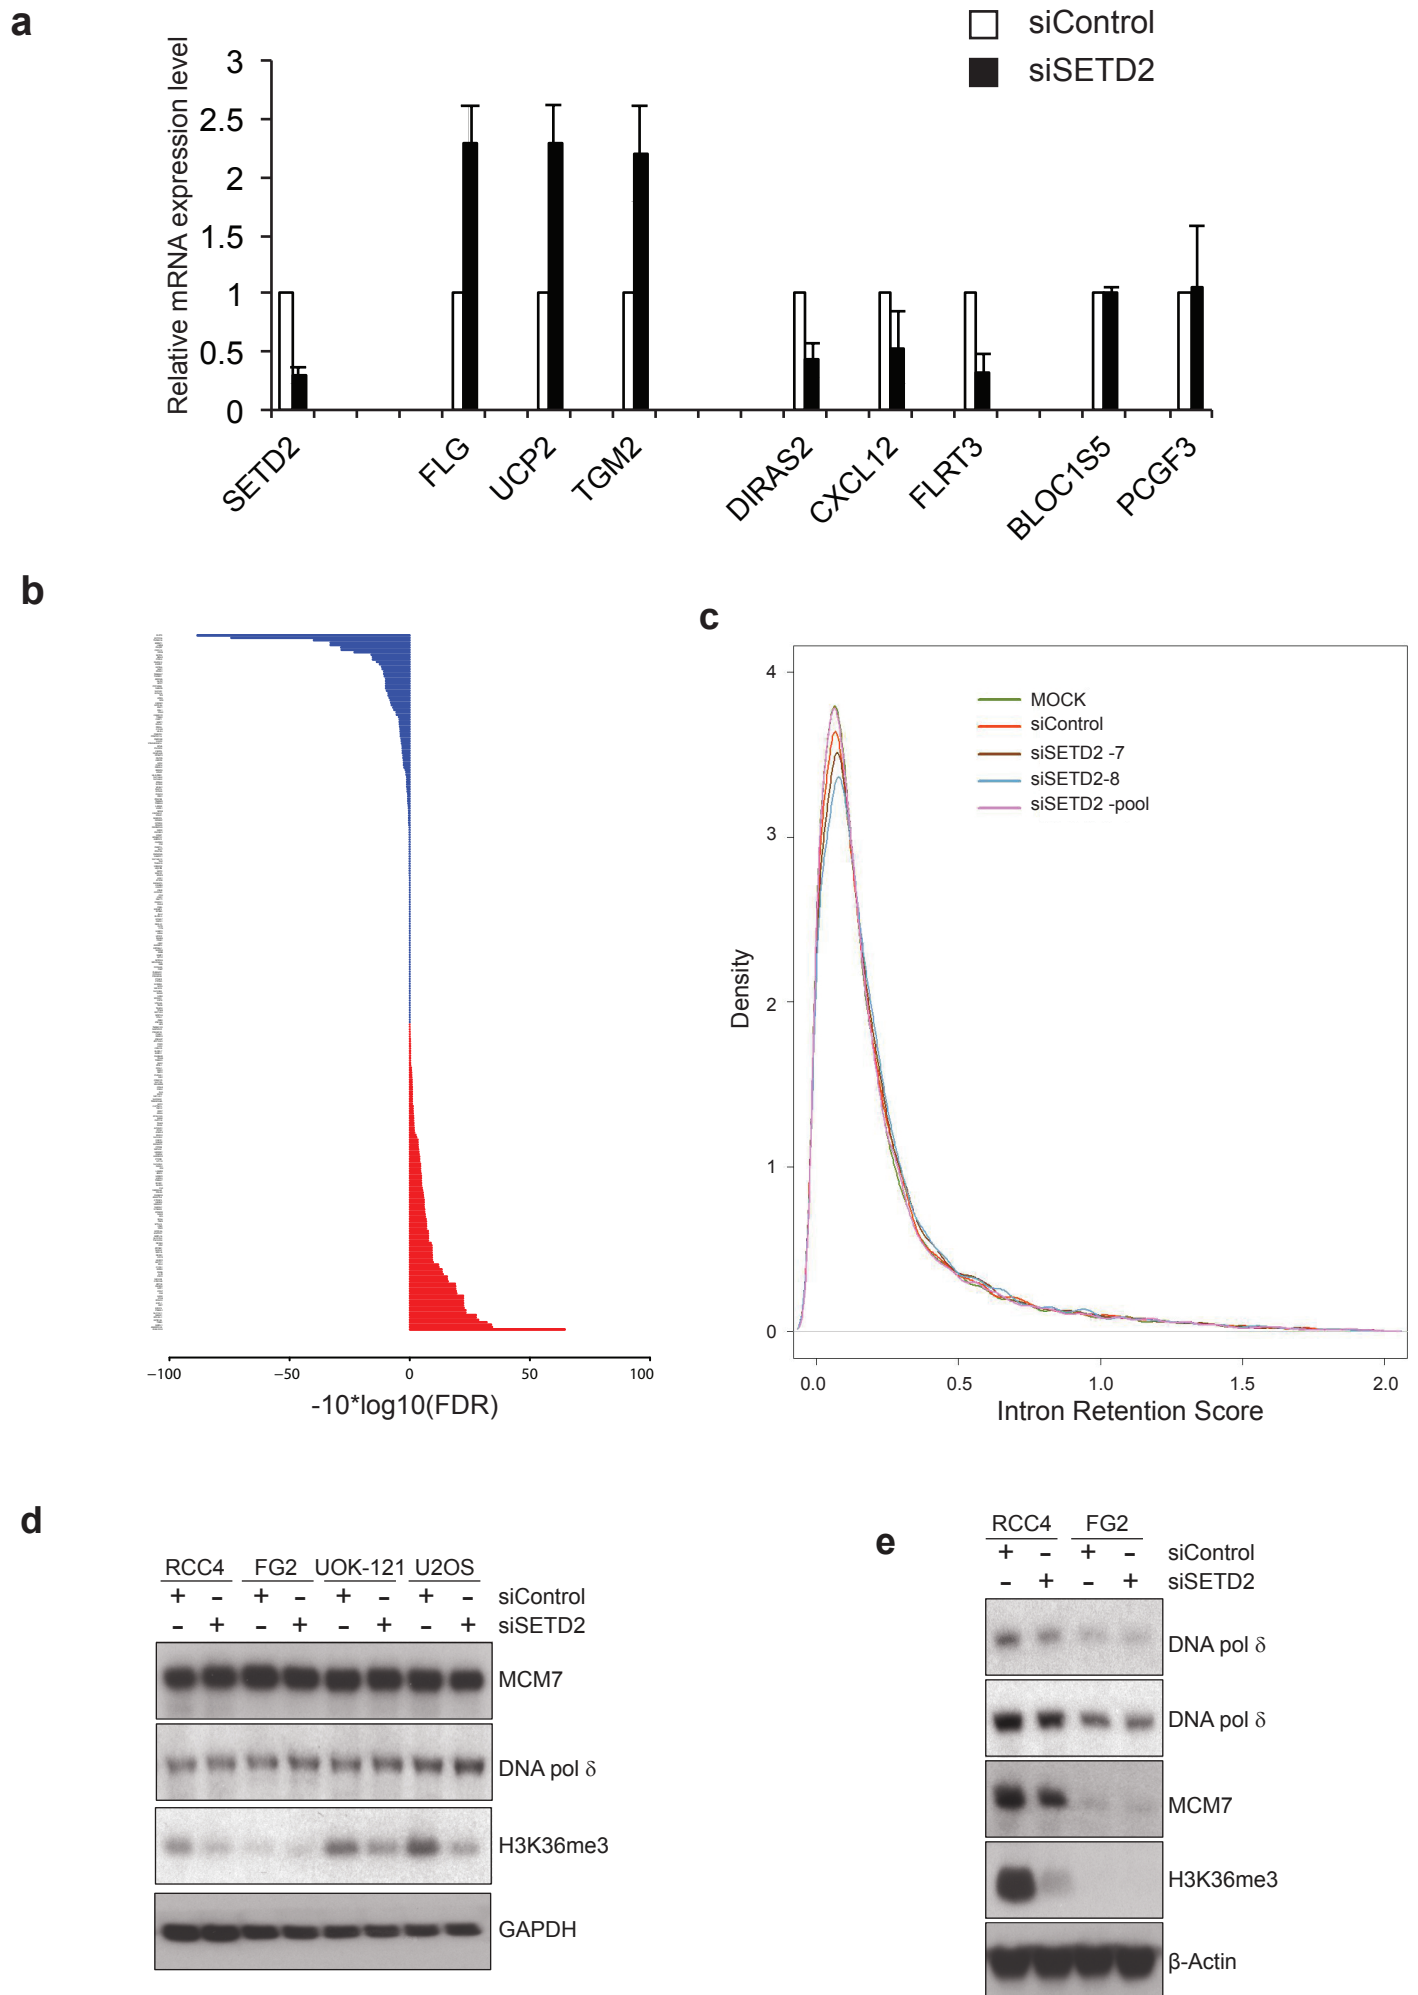

Supplement: onc201524x15.pdf [file onc201524x15.pdf]
